# Supplementary material for: Premature transcription termination at the expanded GAA repeats and aberrant alternative polyadenylation contributes to the Frataxin transcriptional deficit in Friedreich’s ataxia
Source: PubMed Central journal article supplement — Hum Mol Genet. 2022 Jun 16;31(20):3539–57. doi: 10.1093/hmg/ddac134 (PMC9558844; doi:10.1093/hmg/ddac134), 2022-06-16
Supplement: supplemental_information_all_combined_hmg_final_rev_ddac134.pdf [file supplemental_information_all_combined_hmg_final_rev_ddac134.pdf]

## Supplemental information

### Premature transcription termination at the expanded GAA repeats and aberrant alternative polyadenylation contributes to the *Frataxin* transcriptional deficit in Friedreich's ataxia

Yanjie Li, Jixue Li, Jun Wang, Siyuan Zhang, Keith Giles, Thazha P. Prakash, Frank Rigo, Jill S. Napierala, Marek Napierala

|     |                         |       |
|-----|-------------------------|-------|
| 1.  | Table S1                | p. 2  |
| 2.  | Table S2                | p. 5  |
| 3.  | Table S3                | p. 6  |
| 4.  | Table S4                | p. 7  |
| 5.  | Figure S1               | p. 8  |
| 6.  | Figure S2               | p. 9  |
| 7.  | Figure S3               | p. 10 |
| 8.  | Figure S4               | p. 11 |
| 9.  | Figure S5               | p. 12 |
| 10. | Figure S6               | p. 13 |
| 11. | Figure S7               | p. 14 |
| 12. | Supplemental References | p. 16 |

**Table S1. Reagents and resources used in this study.**

| REAGENT or RESOURCE                                             | SOURCE                     | IDENTIFIER       |
|-----------------------------------------------------------------|----------------------------|------------------|
| <b>Antibodies</b>                                               |                            |                  |
| RNA polymerase II CTD repeat YSPTSPS (phospho S5) antibody      | Abcam                      | Cat# ab5131      |
| RNA polymerase II CTD repeat YSPTSPS antibody [8WG16]           | Abcam                      | Cat# ab817       |
| Anti-RNA polymerase II CTD repeat YSPTSPS (phospho S2) antibody | Abcam                      | Cat# ab5095      |
| FXN antibody                                                    | Proteintech                | Cat# 14147-1-AP  |
| ACTIN monoclonal antibody                                       | Santa Cruz                 | Cat# SC-47778    |
| HRP-conjugated rabbit anti-mouse immunoglobulin                 | GE Healthcare life science | Cat# NA934V      |
| HRP-conjugated donkey anti-rabbit immunoglobulin                | GE Healthcare life science | Cat# NA931V      |
| <b>Chemicals, Peptides, and Recombinant Proteins</b>            |                            |                  |
| Diethyl pyrocarbonate                                           | Sigma-Aldrich              | Cat# D5758       |
| Sodium chloride                                                 | Sigma-Aldrich              | Cat# S9888       |
| Potassium chloride                                              | Fisher Scientific          | Cat# P330-500    |
| Magnesium chloride                                              | Acros Organics             | Cat# 223211000   |
| Calcium chloride                                                | Sigma-Aldrich              | Cat# C1016       |
| Magnesium acetate                                               | Sigma-Aldrich              | Cat# M5661       |
| Ammonium acetate                                                | Sigma-Aldrich              | Cat# A1542       |
| Sodium acetate                                                  | Sigma-Aldrich              | Cat# S2889       |
| EDTA                                                            | Sigma-Aldrich              | Cat# E9884       |
| EGTA                                                            | Sigma-Aldrich              | Cat# E3889       |
| Sodium hydroxide                                                | Fisher Scientific          | Cat# S318-1      |
| Triton X-100                                                    | Fisher Scientific          | Cat# BP151       |
| Nonidet P40                                                     | Sigma-Aldrich              | Cat# 11332473001 |
| Tween-20                                                        | Sigma-Aldrich              | Cat# P9416       |
| Tris base                                                       | Fisher Scientific          | Cat# BP152-1     |
| Hydrochloric acid                                               | Fisher Scientific          | Cat# A144S-500   |
| DTT                                                             | Sigma-Aldrich              | Cat# D0632       |
| Glycerol                                                        | Sigma-Aldrich              | Cat# G5516       |
| SYBR Gold nucleic acid gel stain                                | ThermoFisher Scientific    | Cat# S11494      |
| Betaine                                                         | Sigma-Aldrich              | Cat# B0300       |
| Trizol                                                          | ThermoFisher Scientific    | Cat# 115596018   |
| Trizol LS                                                       | ThermoFisher Scientific    | Cat# 10296028    |
| Sarkosyl                                                        | Sigma-Aldrich              | Cat# L5125       |
| GlycoBlue                                                       | ThermoFisher Scientific    | Cat# AM9515      |
| Sucrose                                                         | Sigma-Aldrich              | Cat# S0389       |
| RNase inhibitor                                                 | ThermoFisher Scientific    | Cat# AM2696      |
| Protease Inhibitor Cocktail                                     | Millipore-Sigma            | Cat# P8340       |
| Passive Lysis Buffer                                            | Promega                    | Cat# E1941       |

|                                                                 |                         |                     |
|-----------------------------------------------------------------|-------------------------|---------------------|
| Protein Assay Dye Reagent Concentrate                           | Bio-Rad                 | Cat# 500-0006       |
| Chloroform                                                      | ThermoFisher Scientific | Cat# C606-4         |
| Ethanol, absolute                                               | ThermoFisher Scientific | Cat# BP2818500      |
| Phenol/Chloroform/Isoamyl Alcohol (25:24:1 Mixture, pH 6.7/8.0) | ThermoFisher Scientific | Cat# BP1752-400     |
| Superscript III reverse transcriptase                           | ThermoFisher Scientific | Cat# 18080044       |
| T4 polynucleotide kinase (PNK)                                  | New England Biolabs     | Cat# M0201          |
| RNA 5' Pyrophosphohydrolase (RppH)                              | New England Biolabs     | Cat# M0356S         |
| T4 RNA ligase I                                                 | New England Biolabs     | Cat# B0300          |
| Phusion polymerase                                              | New England Biolabs     | Cat# M0530          |
| Lipofectamine 2000                                              | ThermoFisher Scientific | Cat# 11668019       |
| dNTP mix, 12.5 mM each                                          | Roche                   | Cat# 03622614001    |
| Biotin-11-CTP                                                   | PerkinElmer             | Cat#<br>NEL542001EA |
| ATP, 10 mM                                                      | Roche                   | Cat# 11277057001    |
| GTP, 10 mM                                                      | Roche                   | Cat# 11277057001    |
| UTP, 10 mM                                                      | Roche                   | Cat# 11277057001    |
| 25-bp DNA ladders                                               | ThermoFisher Scientific | Cat# 10597011       |
| Stemolecule™ Y27632                                             | Stemgent                | Cat# 04-0012        |
| Triptolide (TRP)                                                | Sigma-Aldrich           | Cat# T3652-1MG      |
| Flavopiridol Hydrochloride hydrate (FP)                         | Sigma-Aldrich           | Cat# F3055-5MG      |
| Actinomycin D                                                   | Sigma-Aldrich           | Cat# A1410          |
| Collagenase IV                                                  | ThermoFisher Scientific | Cat# 17104019       |
| Dispase                                                         | STEMCELL Technologies   | Cat# 07923          |
| Accutase                                                        | STEMCELL Technologies   | Cat# 07920          |
| Trypsin EDTA, 0.25%                                             | ThermoFisher Scientific | Cat# 25200056       |
| Gelatin porcine skin                                            | SIGMA                   | Cat# G1890          |
| DMEM/F12                                                        | ThermoFisher Scientific | Cat# 11320082       |
| Fetal Bovine Serum                                              | ThermoFisher Scientific | Cat# SH30396.03     |
| Nonessential amino acids                                        | ThermoFisher Scientific | Cat# 11140          |
| DMEM, high glucose                                              | ThermoFisher Scientific | Cat# 11965118       |
| Vitronectin, truncated human recombinant (VTN-N)                | ThermoFisher Scientific | Cat# A14700         |
| Corning Matrigel hESC                                           | ThermoFisher Scientific | Cat# 354277         |
| Clone R                                                         | STEMCELL Technologies   | Cat# 05888          |
| Essential 8™ Medium                                             | ThermoFisher Scientific | Cat# A1517001       |
| <b>Critical Commercial Assays</b>                               |                         |                     |
| CytoTune™-iPS 2.0 Sendai Reprogramming Kit                      | ThermoFisher Scientific | Cat# A16517         |
| TURBO DNA-free kit                                              | ThermoFisher Scientific | Cat# AM1907         |
| MTeSR1 Complete Kit, 500 mL kit                                 | STEMCELL Technologies   | Cat# 85850          |
| Human Stem Cell Nucleofector® Kit                               | Lonza                   | Cat# VPH-5022       |
| Power SYBR™ Green RNA-to-CT™ 1-Step Kit                         | ThermoFisher Scientific | Cat# 4389986        |
| RNeasy Mini Kit                                                 | Qiagen                  | Cat# 74104          |

|                                              |                         |                      |
|----------------------------------------------|-------------------------|----------------------|
| TURBO DNA-free kit                           | ThermoFisher Scientific | Cat# AM1907          |
| FirstChoice® RLM-RACE Kit                    | ThermoFisher Scientific | Cat# AM1700M         |
| TOPO TA/Sequencing PCR4 kit                  | ThermoFisher Scientific | Cat# 450030          |
| MACE-seq kit                                 | GenXPro GmbH            | Cat# 160424.1        |
| QIAquick Gel Extraction Kit                  | Qiagen                  | Cat# 28704           |
| <b>Deposited Data</b>                        |                         |                      |
| PRO-seq data                                 | Available upon request  |                      |
| ChIP-seq data                                | Available upon request  |                      |
| MACE-seq data                                | Available upon request  |                      |
| RNA-seq data                                 | Available upon request  |                      |
| <b>Experimental Models: Cell Lines</b>       |                         |                      |
| Human fibroblast (control and FRDA)          | Napierala laboratory    | (Li et al., 2016)    |
| Human iPSC (control and FRDA)                | Napierala laboratory    | (Polak et al., 2012) |
| Human iPSC (GAA repeat homo-deleted)         | This paper              |                      |
| Drosophila S2 Cells                          | ThermoFisher Scientific | Cat# R69007          |
| One Shot® Mach1™-T1R competent cells         | ThermoFisher Scientific | Cat# C862003         |
| <b>Oligonucleotides</b>                      |                         |                      |
| Oligonucleotides for PRO-seq                 | This paper              | Table S3             |
| Oligonucleotides for 3-RACE                  | This paper              | Table S3             |
| Oligonucleotides for RT-qPCR                 | This paper              | Table S3             |
| <b>Software and Algorithms</b>               |                         |                      |
| SnapGene                                     | GSL Biotech LLC         |                      |
| GraphPad Prism v.6                           | GraphPad Software       |                      |
| Partek Flow                                  | Partek                  |                      |
| Integrative Genomics Viewer (IGV)            | Broad Institute         |                      |
| Alternative Splice Site Predictor (ASSP)     | wangcomputing.com       |                      |
| mfold                                        | UNAFold                 |                      |
| <b>Other</b>                                 |                         |                      |
| P-30 column, RNase-free                      | Bio-Rad                 | Cat# 732-6250        |
| Dynabeads™ Protein A for Immunoprecipitation | ThermoFisher Scientific | Cat# 100-02D         |
| Dynabeads® M-280 Streptavidin                | ThermoFisher Scientific | Cat# 11205D          |
| NuPAGE™ 4 to 12%, Bis-Tris                   | ThermoFisher Scientific | Cat# NP0322BOX       |
| Native PAGE gel 8% TBE                       | ThermoFisher Scientific | EC6215BOX            |

**Table S2. Cell lines used in this study.** FRDA iPSC and fibroblast cells are part of the FRDA Cell Line Repository (FACLR) (Li et al., 2016). FRDA 1 and CTRL 1 iPSCs were characterized in (Li et al., 2015), while FRDA 2, 3 and edited lines are described in detail in FACLR or in Supplemental Figure S7. Sizes of the GAA repeats in FRDA iPSCs and fibroblasts were determined as we described in (Polak et al., 2016).

| <b>Cell line</b>                  | <b>GAA repeat length<br/>(GAA1, GAA2)</b> |
|-----------------------------------|-------------------------------------------|
| <b><i>iPSC</i></b>                |                                           |
| FRDA 1                            | 600, 600                                  |
| FRDA 2                            | 590, 830                                  |
| FRDA 3                            | 750, 750                                  |
| CTRL 1                            | unaffected                                |
| FRDA 2 $\Delta$ GAA 3B12          | corrected                                 |
| FRDA 2 $\Delta$ GAA 3C7           | corrected                                 |
| FRDA 3 $\Delta$ GAA 2B1           | corrected                                 |
| FRDA 3 $\Delta$ GAA 2D3           | corrected                                 |
| <b><i>Primary Fibroblasts</i></b> |                                           |
| F1                                | 495, 505                                  |
| F2                                | 490, 680                                  |
| F3                                | 916, 1382                                 |
| F4                                | 630, 806                                  |
| F5                                | 816, 1410                                 |
| F6                                | 870, 1470                                 |
| F7                                | 404, 920                                  |
| F8                                | 526, 826                                  |
| F9                                | 211, 1428                                 |
| F10                               | 468, 807                                  |
| F11                               | 190, 500                                  |
| F12                               | 185, 1130                                 |
| F13                               | 570, 1200                                 |
| F14                               | 422, 520                                  |
| C1                                | unaffected                                |
| C2                                | unaffected                                |
| C3                                | unaffected                                |
| C4                                | unaffected                                |
| C5                                | unaffected                                |
| C6                                | unaffected                                |
| C7                                | unaffected                                |
| C8                                | unaffected                                |
| C9                                | unaffected                                |
| C10                               | unaffected                                |
| C11                               | unaffected                                |
| C12                               | unaffected                                |
| C13                               | unaffected                                |

**Table S3. Identification of the polyadenylation sites in FRDA and control iPSCs by MACE-seq.** The most common PA is indicated in green. An alternative PA site identified only in FRDA iPSCs located immediately upstream of the expanded GAAs is highlighted in blue. A total of 24 and 57 curated reads were assigned in FRDA and control cells, respectively. \* A single read in intron 1 of *FXN* was identified in CTRL iPSCs. This site however, is located downstream of the expanded GAAs. The bioinformatic pipeline used to define the APA sites is described in STAR ★Methods.

#### FRDA 1 iPSC

| Locus      | Start of APA | End of PA | Chromosome | Feature | Strand | # of reads |
|------------|--------------|-----------|------------|---------|--------|------------|
| <i>FXN</i> | 71652176     | 71652184  | chr9       | Intron  | +      | 2          |
| <i>FXN</i> | 71687982     | 71687987  | chr9       | UTR3    | +      | 2          |
| <i>FXN</i> | 71688012     | 71688032  | chr9       | UTR3    | +      | 13         |
| <i>FXN</i> | 71689255     | 71689256  | chr9       | UTR3    | +      | 1          |
| <i>FXN</i> | 71689690     | 71689691  | chr9       | UTR3    | +      | 1          |
| <i>FXN</i> | 71689804     | 71689809  | chr9       | UTR3    | +      | 2          |
| <i>FXN</i> | 71693989     | 71693994  | chr9       | UTR3    | +      | 3          |

#### Control 1 iPSC

| Locus      | Start of APA | End of PA | Chromosome | Feature | Strand | # of reads |
|------------|--------------|-----------|------------|---------|--------|------------|
| <i>FXN</i> | 71652417     | 71652418  | chr9       | Intron* | +      | 1          |
| <i>FXN</i> | 71687717     | 71687759  | chr9       | UTR3    | +      | 5          |
| <i>FXN</i> | 71687973     | 71688006  | chr9       | UTR3    | +      | 5          |
| <i>FXN</i> | 71688012     | 71688030  | chr9       | UTR3    | +      | 30         |
| <i>FXN</i> | 71688133     | 71688141  | chr9       | UTR3    | +      | 3          |
| <i>FXN</i> | 71688397     | 71688398  | chr9       | UTR3    | +      | 1          |
| <i>FXN</i> | 71689129     | 71689130  | chr9       | UTR3    | +      | 1          |
| <i>FXN</i> | 71689255     | 71689260  | chr9       | UTR3    | +      | 2          |
| <i>FXN</i> | 71689694     | 71689695  | chr9       | UTR3    | +      | 1          |
| <i>FXN</i> | 71689807     | 71689813  | chr9       | UTR3    | +      | 3          |
| <i>FXN</i> | 71691494     | 71691495  | chr9       | UTR3    | +      | 1          |
| <i>FXN</i> | 71693955     | 71693956  | chr9       | UTR3    | +      | 1          |
| <i>FXN</i> | 71693988     | 71693999  | chr9       | UTR3    | +      | 3          |

**Table S4. Oligonucleotides used in this study.**

| <b>Oligo</b>                                   | <b>Sequence</b>                                                                                                           |
|------------------------------------------------|---------------------------------------------------------------------------------------------------------------------------|
| <i>3' RACE and PRO-seq oligonucleotides</i>    |                                                                                                                           |
| 3' RACE adaptor                                | 5' GCATCGTACGCGTACGTGTTTTTTTTTTTTNN                                                                                       |
| 3' RACE primer                                 | 5' GCATCGTACGCGTACGTGTT                                                                                                   |
| VRA3 adaptor                                   | 5' GAUCGUCGGACUGUAGAACUCUGAAC-/inverted dT/<br>The 5' end is phosphorylated and the 3' end is protected by an inverted dT |
| VRA5 adaptor                                   | 5' CCUUGGCACCCGAGAAUCCA<br>The 5' end is not phosphorylated                                                               |
| RP1                                            | 5' AATGATACGGCGACCACCGAGATCTACACGTTTCAGAGTTCTACAGTCCGA                                                                    |
| RPI-1                                          | 5' CAAGCAGAAGACGGCATAACGAGATCGTGATGTGACTGGAGTTCCTTGGCACCCGAGAATTCCA                                                       |
| RPI-2                                          | 5' CAAGCAGAAGACGGCATAACGAGATACATCGGTGACTGGAGTTCCTTGGCACCCGAGAATTCCA                                                       |
| <i>qRT-PCR primers</i>                         |                                                                                                                           |
| FXN_F                                          | 5' CAGAGGAAACGCTGGACTCT                                                                                                   |
| FXN_R                                          | 5' AGCCAGATTTGCTTGTTTGG                                                                                                   |
| GAPDH_F                                        | 5' GAAGGTGAAGGTCGGAGTC                                                                                                    |
| GAPDH_R                                        | 5' GAAGATGGTGATGGGATTTCC                                                                                                  |
| ACTIN_F                                        | 5' GCCAACCGCGAGAAGATGACC                                                                                                  |
| ACTIN_R                                        | 5' CTCCTTAATGTCACGCACGATT                                                                                                 |
| FXN-ett_F                                      | 5' GCACCGACATCGATGCGACC                                                                                                   |
| FXN-ett_R                                      | 5' CACAGCCATTCTTTGGGTTTC                                                                                                  |
| MYC_F                                          | 5' CCTGGTGCTCCATGAGGAGAC                                                                                                  |
| MYC_R                                          | 5' CAGACTCTGACCTTTTGCCAGG                                                                                                 |
| <i>GAA PCR and CRISPR/Cas9 editing primers</i> |                                                                                                                           |
| GAA_F                                          | 5' GGAGGGAACCGTCTGGGCAAAGG                                                                                                |
| GAA_R                                          | 5' CAATCCAGGACAGTCAGGGCTTT                                                                                                |
| UP_jct_F                                       | 5' AGATGAAAGAGGCAGGCCAC                                                                                                   |
| UP_jct_R                                       | 5' GTGGCCTGCCTCTTTCATCT                                                                                                   |
| DW_jct_F                                       | 5' CAACCTCTGTCACCAGCTGG                                                                                                   |
| DW_jct_R                                       | 5' CCCACCACCATGCTGAGCTA                                                                                                   |
| UP_DW_jct_F                                    | 5' GGTACAAAGAAATATCTGACCC                                                                                                 |
| UP_DW_jct_R                                    | 5' CTGATTACATGTTGGAATGATA                                                                                                 |

**Figure S1. Sanger sequencing of the 3' RACE PCR product representing *FXN* mRNA isoform type I.** The most common, canonical form of the *FXN* mRNA was amplified by 3' RACE, excised from an agarose gel, cloned and sequenced. Locations of all exons, RACE primers and vector flanking sequences are indicated.

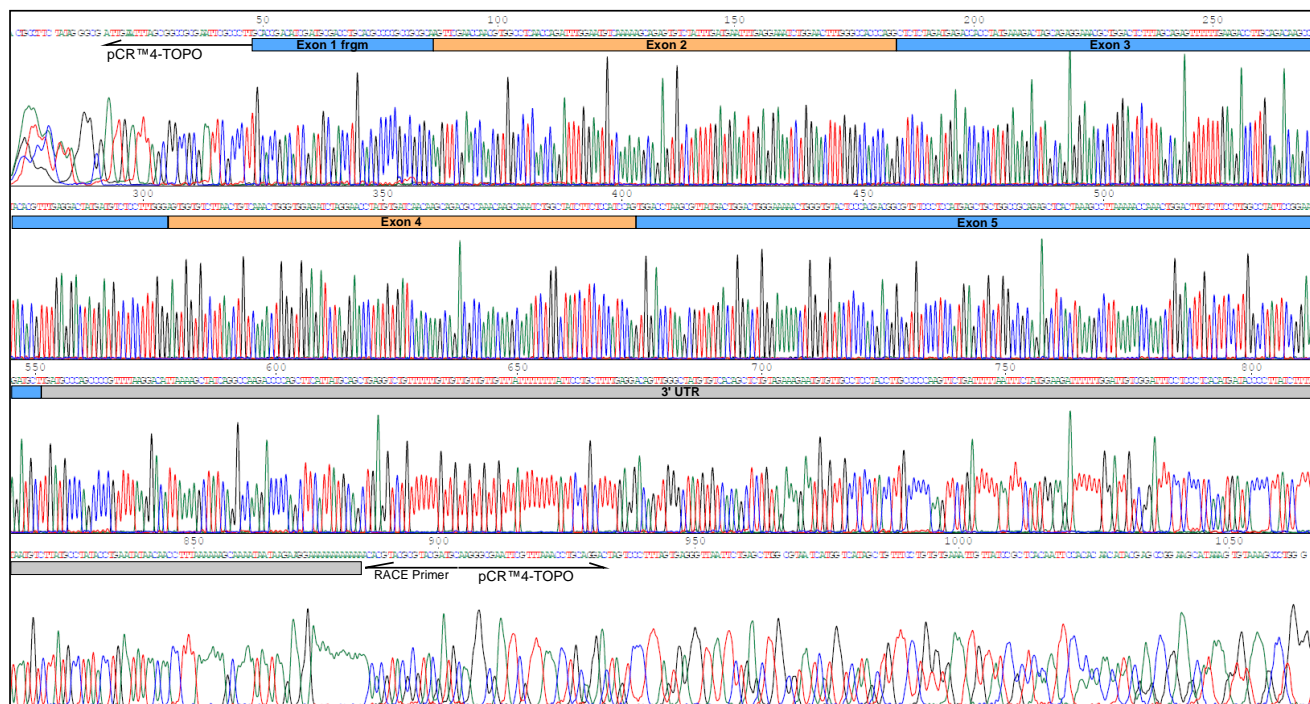



**Figure S2. Sanger sequencing of the 3' RACE PCR product representing isoform type IV – *FXN-ett* RNA.** The *FXN-ett* RNA is the predominant transcript detected using 3' RACE in FRDA cells. Exon 1, intron 1, location of the 683 nt splice fragment are indicated along with RACE primers and vector flanking sequences.

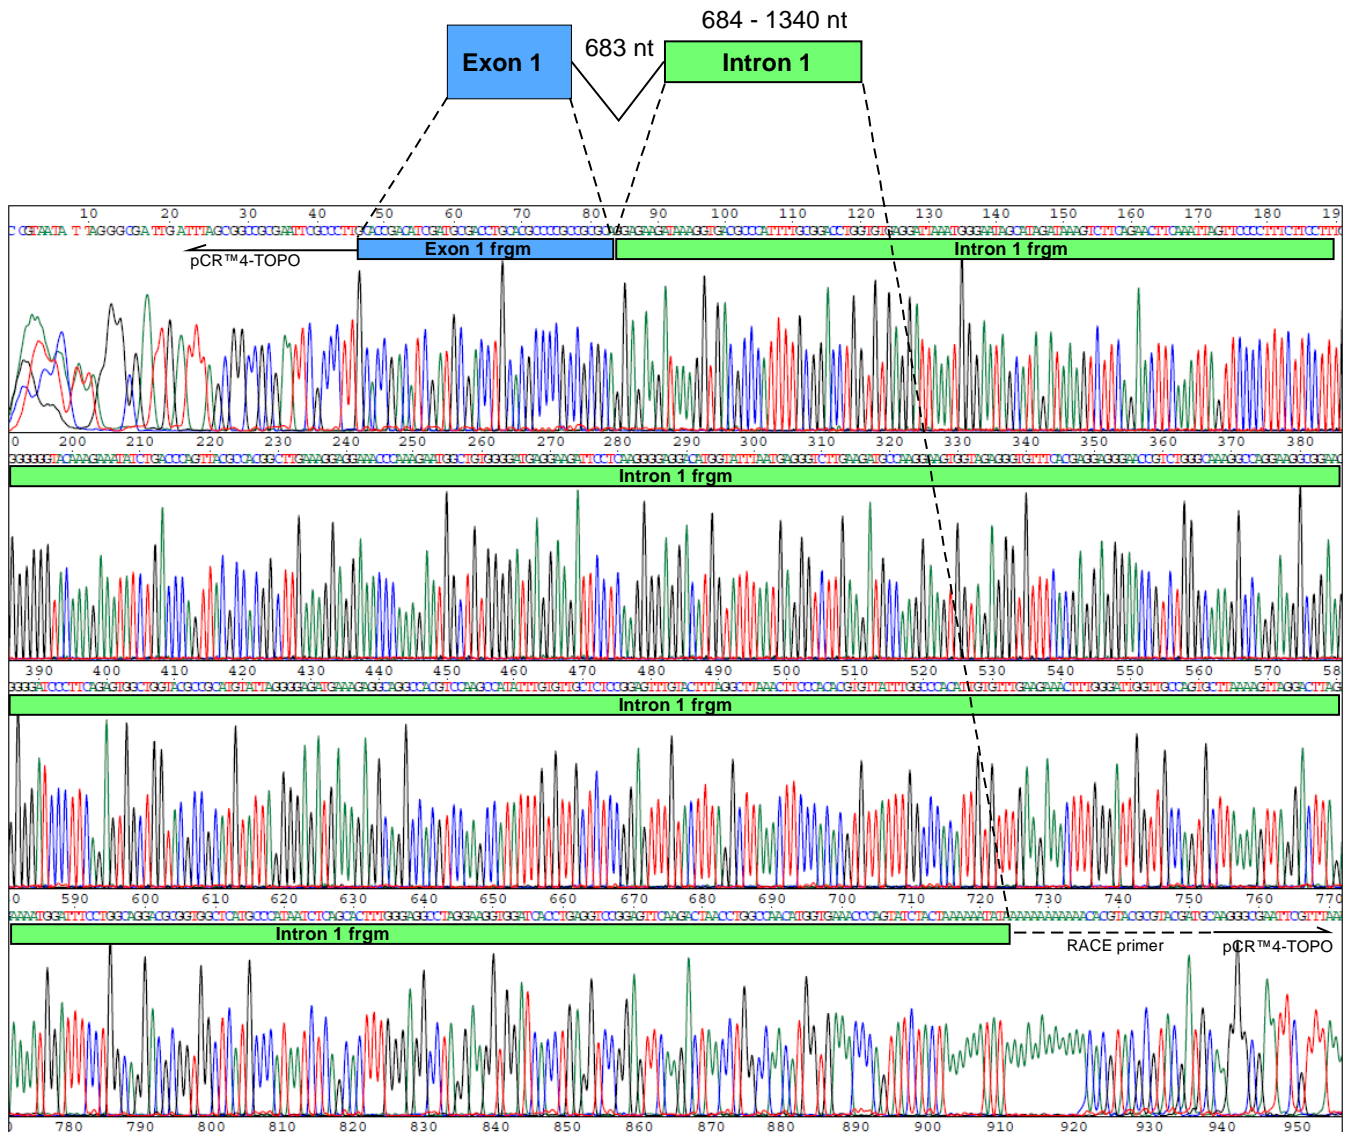

**Figure S3. Figure S3. Mapping of RNA-seq reads to intron 1 of *FXN* in FRDA 1 and CTRL 1 iPSCs.** Two reads corresponding to the spliced *FXN-ett* transcript are indicated by the arrow heads. Their 5' end sequence (indicated) starts at position 848 (A of the ATG START codon is designated as 1). No RNA-seq reads corresponding to the spliced *FXN-ett* were identified in CTRL 1 cells. The vertical black line indicates the position of the splice site.

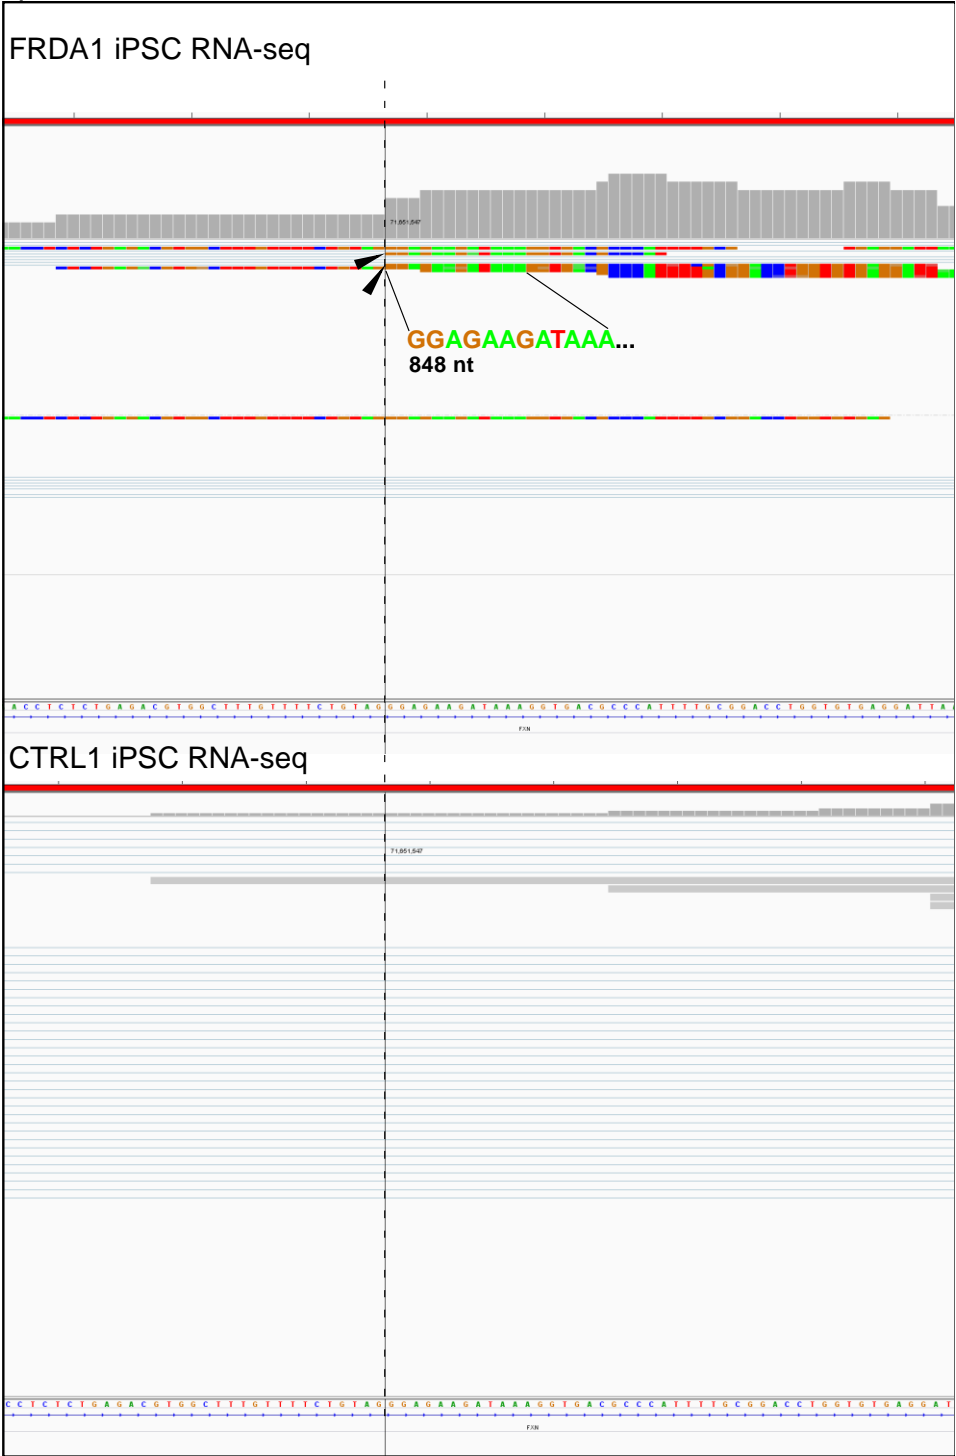

**Figure S4. Figure S4. Prediction of the alternative splice sites in the proximal fragment of *FXN* intron 1 using Alternative Splice Site Predictor (ASSP) (Wang and Marin, 2006).** The sequence of the entire exon 1 (starting at position 1 ATG) through intron 1 to the beginning of the GAA tract was used in the analyses. A. ASSP-predicted splice donor and acceptor sites. Constitutive donor site (D1, highlighted in yellow) and four putative acceptor splice sites are indicated as A1 – A4. Scores of the preprocessing models reflecting splice site strength. Constitutive acceptor A3 highlighted in red has the highest score reflecting the most probable acceptor in a given region. A3 is the acceptor site utilized in *FXN-ett* RNA. B. Location of the predicted splice donor and acceptor sites in the *FXN* mRNA sequence. The sequence of exon 1 is underlined. The ATG start codon is indicated in green font.

**A**

|    | Position (bp) | Putative splice site  | Sequence             | Score* |
|----|---------------|-----------------------|----------------------|--------|
| D1 | 165           | Constitutive donor    | CCGCCGCGCAgtaagtatcc | 13.818 |
| A1 | 302           | Constitutive acceptor | tccttctcagGGCGGCCCGG | 9.749  |
| A2 | 654           | Constitutive acceptor | tattttcaagGCTGGATTTT | 3.737  |
| A3 | 849           | Constitutive acceptor | ttttctgtagGGAGAAGATA | 11.260 |
| A4 | 1365          | Constitutive acceptor | ttcctggcagGACGCGGTGG | 6.003  |

**B**

Atgtggaactctcgggcgccgcgcagtagccggcctcctggcgtcaccagcccagcccaggccc  
agaccctcaccgggtcccgcggccggcagagtggccccactctgcggccgcctggcctgcg  
caccgacatcgatgacactgcacgcc**ccgccgcgcagtaagtatcc**gcgccgggaacagccgc  
ggccgcacgcgcggggccgcacgcgcacgcctgcccagggaggcgccgcgacgcgggggtc  
gctccgggtacgcgcgctggactagctcaccgcgc**tccttctcagggcgcccg**cggaagcgg  
ccttgcaactcccttctctggttctccgggttgcatttacactggcttctgctttccgaaggaa  
aaggggacattttgtcctgcggtgacactgcccgtcaaggcagggcggaaggcaggcgaggctg  
gtggaggggaccggttccgaggggtgtgcccgtgtctccatgcttgtcacttctctgcgataac  
ttgtttcagtaataattaatagatggatctgctagatataacataacataaatgtgtgtgtctg  
tgtgtatctgtatagcgtgtgtgtgtgtgtgtgtgtttgcccgcacgggcccgcgcacacc  
taa**tattttcaaggctggatttt**tttgaacgaaatgctttcctggaacgaggtgaaactttcag  
agctgcagaatagctagagcagcaggggcccctggcttttggaactgaccgcacctttattcca  
gattctgccccactccgcagagctgtgtgaccttgggggattcccctaacctctctgagacgtg  
gctttg**ttttctgtaggagaagata**aaggtgacgccattttgcccagctgggtgtgaggatta  
aatgggaataacatagataaagtcttcagaacttcaaattagttcccctttctcctttggggg  
gtacaaagaaatatctgaccagttacgccacggcctgaaaggaggaaacccaaagaatggctg  
tgggatgaggaagattcctcaaggggaggacatggatatttaagagggtcctgaagatgccaa  
ggaagtggtagagggtgtttcagaggagggaaccgtctgggcaaaggccaggaaggcggagg  
ggatcccctcagagtggtggtacgcccatgtattaggggagatgaaagaggcaggccacgctc  
caagccatatttgtgttgctctccggagtttgactttaggcctgaaacttcccacacgtgttat  
ttggcccacattgtgtttgaagaaactttgggattgggtgcccagtgcttaaaagttaggactta  
gaaaatggatt**tcctggcaggacgcggtgg**ctcatgcccataatctcagcactttgggaggcct  
aggaaggtggatcacctgaggtccggagttcaagactaacctggccaacatggtgaaaccagt  
atctactaaaaatacaaaaaaaaaa



**Figure S6. Figure S6. Half-life of *FXN-ett* RNA.** The half-lives of *FXN-ett* RNA and *Myc* mRNA were determined in two FRDA fibroblast lines (F4 gray circles and F7 black squares) using an actinomycin D approach (described in STAR ★Methods). Error bars correspond to technical replicates.

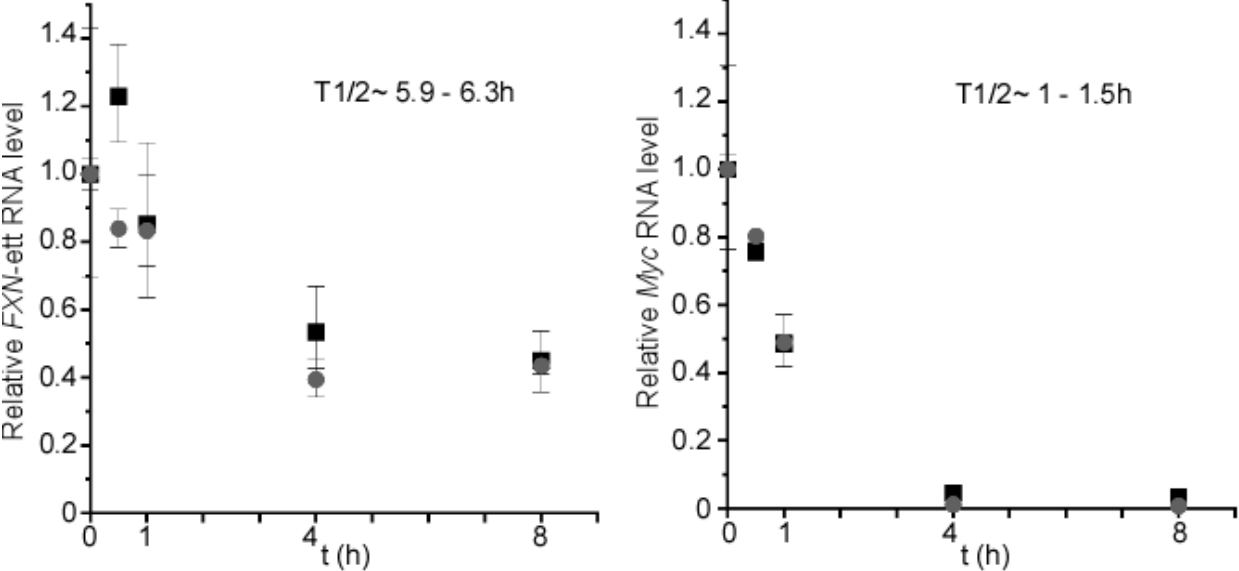

**Figure S7. Excision of the expanded GAA tract from FRDA iPSCs using CRISPR/Cas9.** A. Schematic illustrating localization of gRNAs in the *FXN* locus (drawn to scale). A guide upstream of the GAAs (gUP) is shown in green. The predicted Cas9 cut site is located at position 1112 bp (A of the ATG start is designated as 1). The length of the PCR product for the UP junction is indicated. A guide downstream of the GAAs (gDW) is indicated in purple together with amplicon length of the DW junction PCR and Cas9 cut site at 2498 bp. The position of the cut site is calculated based on the presence of only 6 GAAs (18 bp). Length of the UP-DW junction PCR amplicon after excision of the expanded GAAs together with flanking sequences is 395 bp. Lengths of the flanking sequences removed together with expanded GAAs are indicated in black. In addition, positions of the *FXN-ett* splice donor (blue D) and acceptor (blue A) sites are indicated along with approximate locations of qRT-PCR primers used for *FXN-ett* quantification. Sequences of both gRNAs are given below and all primers used for PCR analyses are listed in Table S3. B. PCR analysis of the UP and DW junctions in parental (P) and homozygous (Hom) edited clones: for FRDA 2 line Hom 3B12 and 3C7 and for FRDA 3 line Hom 2B1 and 2D3. Heterozygous (Het) edited lines (expanded GAA tract excised from only one of the two *FXN* alleles) are shown for reference. C. PCR analysis of the UP-DW junction in both Het and Hom edited clones. D. determination the GAA tracts sizes in P, Het and Hom FRDA 2 and FRDA 3 cells. E. Sanger sequencing of the UP-DW junction PCR products. The exact sequence of the junction resulting from Cas9-mediated GAA tract excision is indicated for each cell line. Line FRDA 3 clone 2B1 contains alleles that differ by two base pairs.

**A**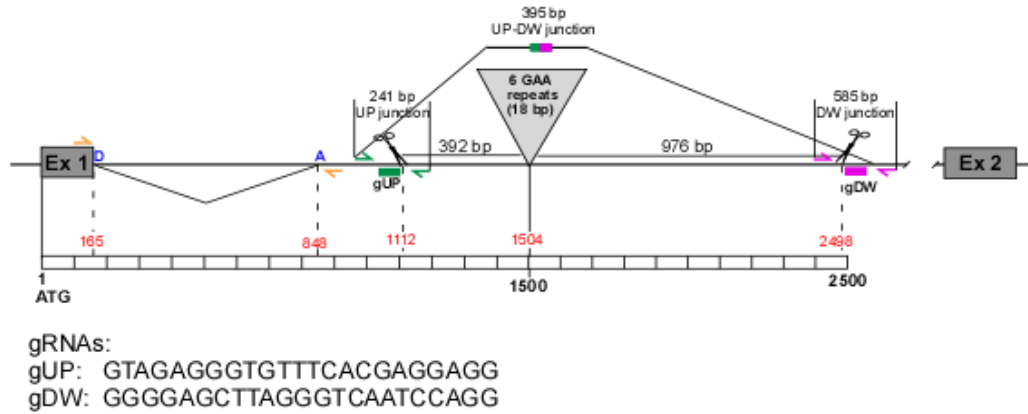**B**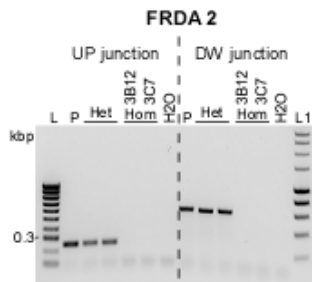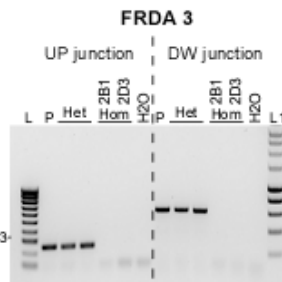**C**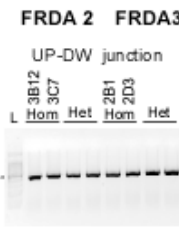**D**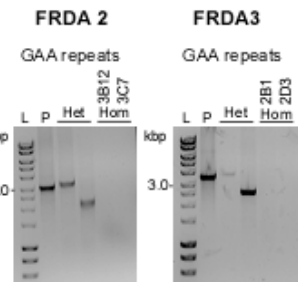**E**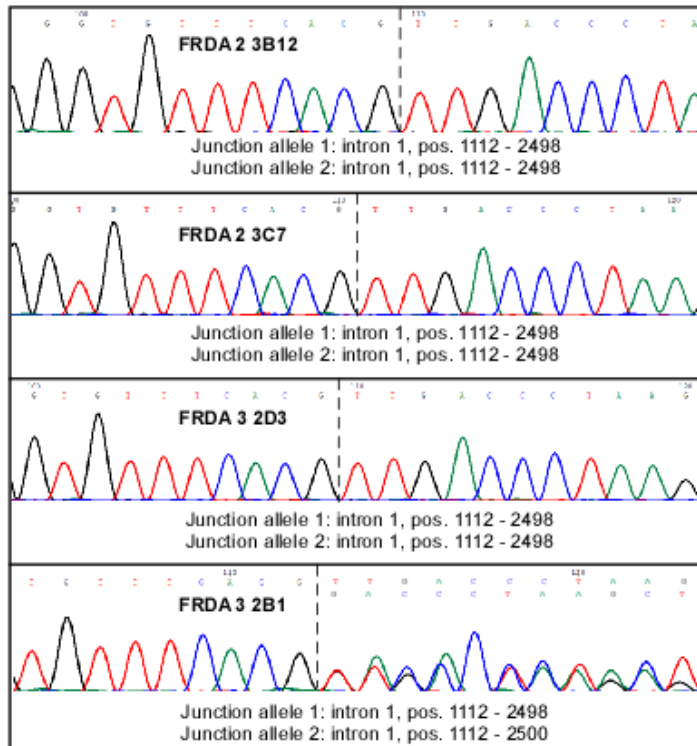

## Supplemental References

Li, Y., Polak, U., Bhalla, A.D., Rozwadowska, N., Butler, J.S., Lynch, D.R., Dent, S.Y., and Napierala, M. (2015). Excision of Expanded GAA Repeats Alleviates the Molecular Phenotype of Friedreich's Ataxia. *Mol Ther* 23, 1055-1065.

Li, Y., Polak, U., Clark, A.D., Bhalla, A.D., Chen, Y.Y., Li, J., Farmer, J., Seyer, L., Lynch, D., Butler, J.S., *et al.* (2016). Establishment and Maintenance of Primary Fibroblast Repositories for Rare Diseases-Friedreich's Ataxia Example. *Biopreserv Biobank* 14, 324-329.

Markham, N.R., and Zuker, M. (2008). UNAFold: software for nucleic acid folding and hybridization. *Methods Mol Biol* 453, 3-31.

Polak, U., Li, Y., Butler, J.S., and Napierala, M. (2016). Alleviating GAA Repeat Induced Transcriptional Silencing of the Friedreich's Ataxia Gene During Somatic Cell Reprogramming. *Stem Cells Dev* 25, 1788-1800.

Wang, M., and Marin, A. (2006). Characterization and prediction of alternative splice sites. *Gene* 366, 219-227.
